# Supplementary material for: Highly time-resolved urban aerosol characteristics during springtime inYangtze River Delta, China: insights from soot particle aerosol massspectrometry
Source: Copernicus journal article supplement (doi:10.5194/acp-16-9109-2016), 2016-07-25
Supplement: Supplementary file 1 [file acp-16-9109-2016-supplement.pdf]

Supplement of Atmos. Chem. Phys., 16, 9109–9127, 2016  
<http://www.atmos-chem-phys.net/16/9109/2016/>  
doi:10.5194/acp-16-9109-2016-supplement  
© Author(s) 2016. CC Attribution 3.0 License.

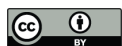

Atmospheric  
Chemistry  
and Physics  
Open Access  
EGU

*Supplement of*

## **Highly time-resolved urban aerosol characteristics during springtime in Yangtze River Delta, China: insights from soot particle aerosol mass spectrometry**

**Junfeng Wang et al.**

*Correspondence to:* Xinlei Ge (caxinra@163.com) and Mindong Chen (chenmdnuist@163.com)

The copyright of individual parts of the supplement might differ from the CC-BY 3.0 licence.

29

30

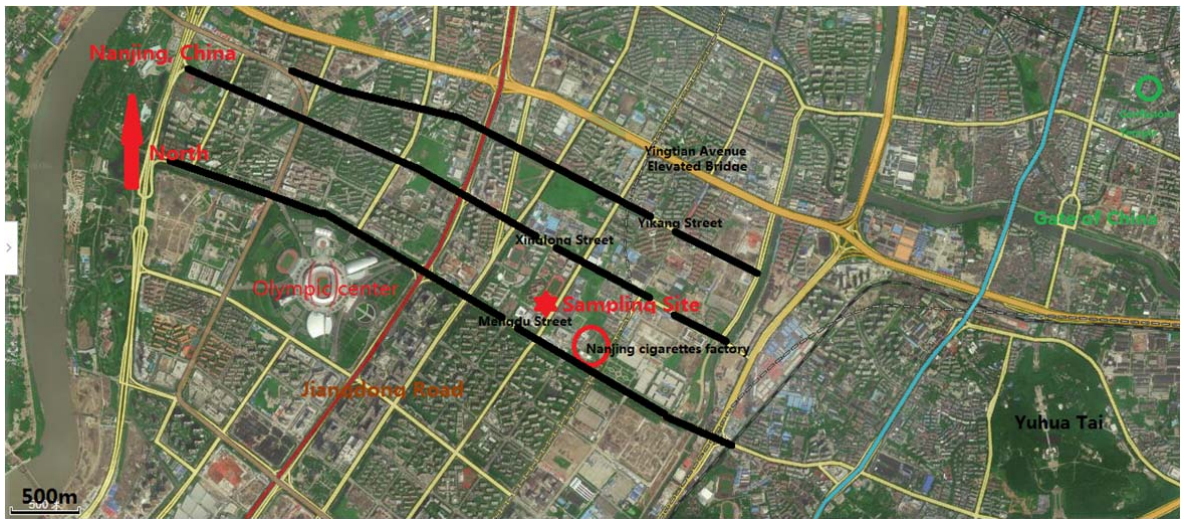

31

32

33 Figure S1. Map of the sampling site and its surroundings.

34

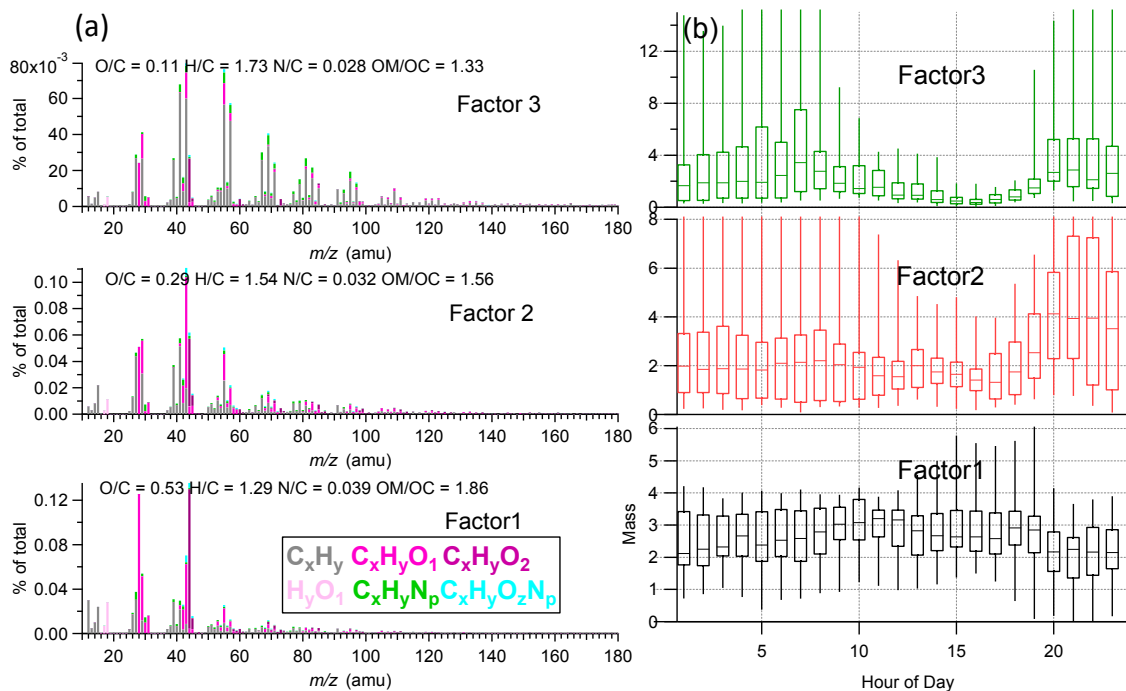

35

36 Figure S2. High resolution mass spectra (a) and diurnal mass profiles of OA  
 37 components of 3-factor solution from PMF analyses (b) (the lines in the boxes  
 38 indicate the median values, the upper and lower boundaries of the boxes indicate the  
 39 75th and 25th percentiles, and the whiskers above and below the boxes indicate the  
 40 95th and 5th percentiles).

41

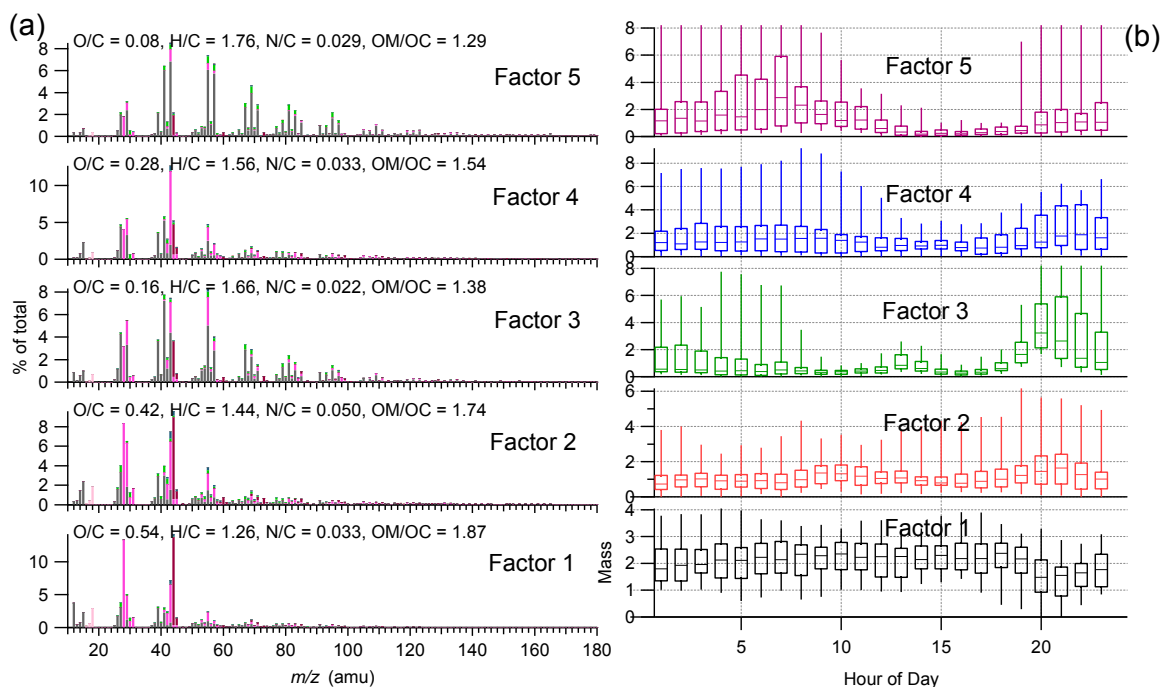

42

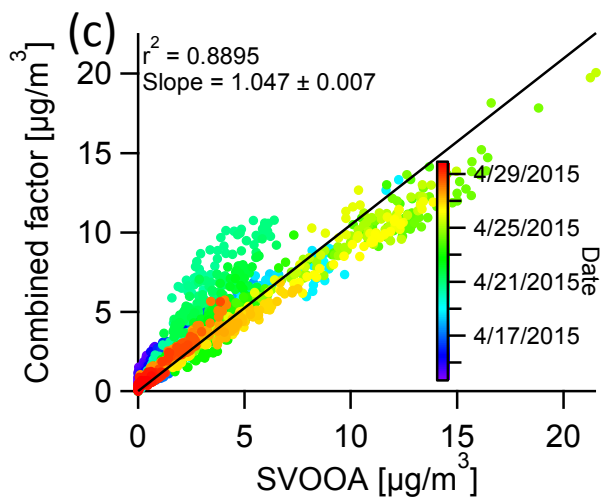

43

44

45

46 Figure S3. High resolution mass spectra (a) and diurnal mass profiles of OA  
 47 components of 5-factor solution from PMF analyses (b) (the lines in the boxes  
 48 indicate the median values, the upper and lower boundaries of the boxes indicate the  
 49 75th and 25th percentiles, and the whiskers above and below the boxes indicate the  
 50 95th and 5th percentiles), (c) Scatter plot of the combined factor (Factor 2 and Factor  
 51 4) versus the SVOOA in 4-factor solution (Fig. 9a).

52

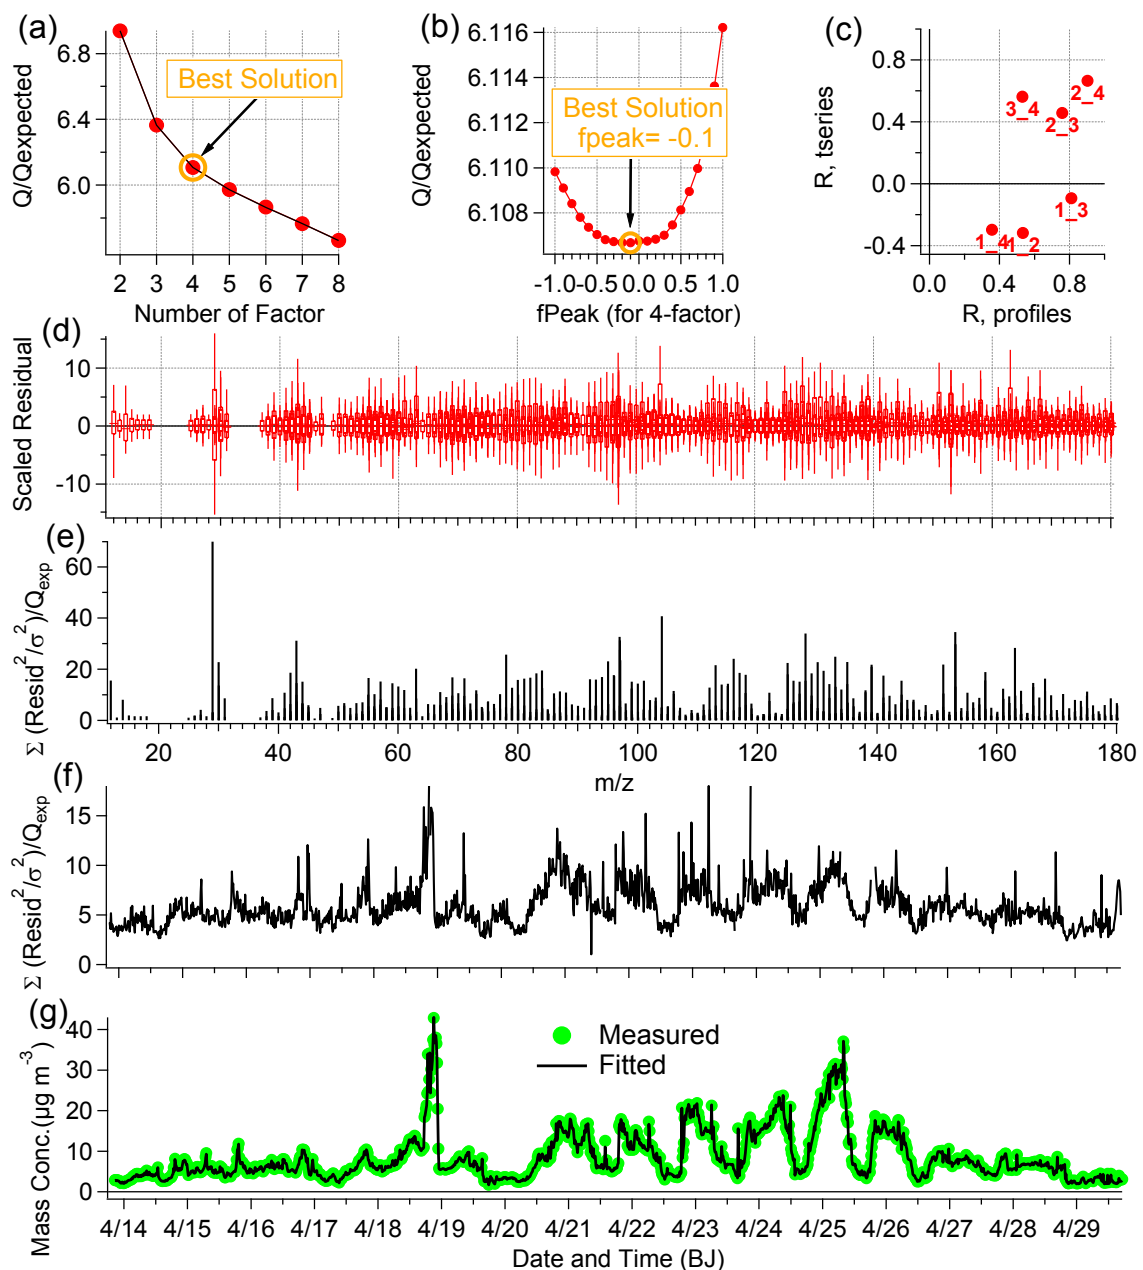

53

54

55 Figure S4. Summary of key diagnostic plots of the PMF results: (a)  $Q/Q_{\text{exp}}$  as a  
 56 function of number of factors ( $p$ ) selected for PMF analysis. For the best solution (4-  
 57 factor solution): (b)  $Q/Q_{\text{exp}}$  as a function of  $f_{\text{peak}}$ , (c) cross-correlation coefficients ( $R$ )  
 58 of the time series and spectral profiles among the PMF factors, (d) the box and  
 59 whiskers plot showing the distributions of scaled residuals for each  $m/z$ , (e) the  $Q/Q_{\text{exp}}$   
 60 values for each ion, (f) the  $Q/Q_{\text{exp}}$  for each point in time, and (g) time series of the  
 61 measured OA mass and the reconstructed OA mass (= HOA + COA + SV-OOA +  
 62 LV-OOA).

63

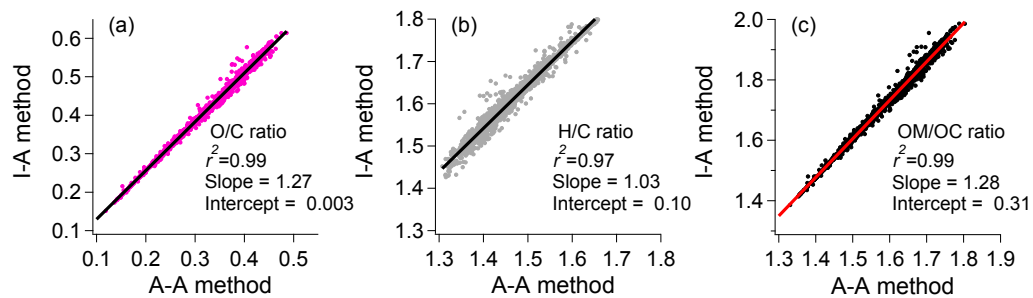

64  
 65  
 66  
 67

Figure S5. Scatter plot of the O/C ratios (a), H/C ratios (b), and OM/OC ratios (d) calculated by using the I-A method versus those by using the A-A method.

68

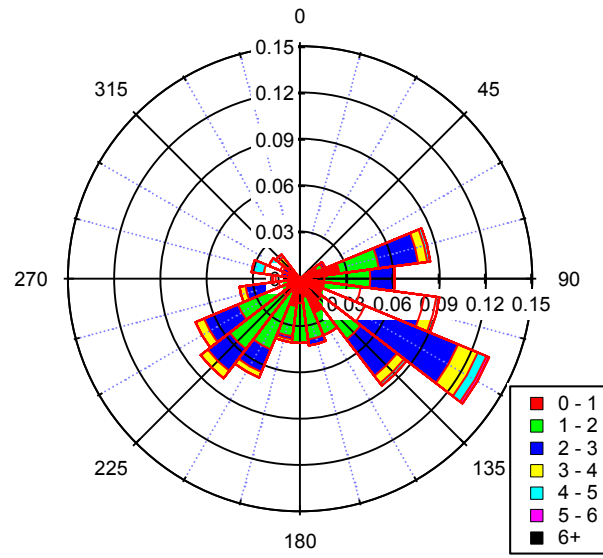

69

70 Figure S6. Wind rose plot for the entire sampling period.

71

72  
73

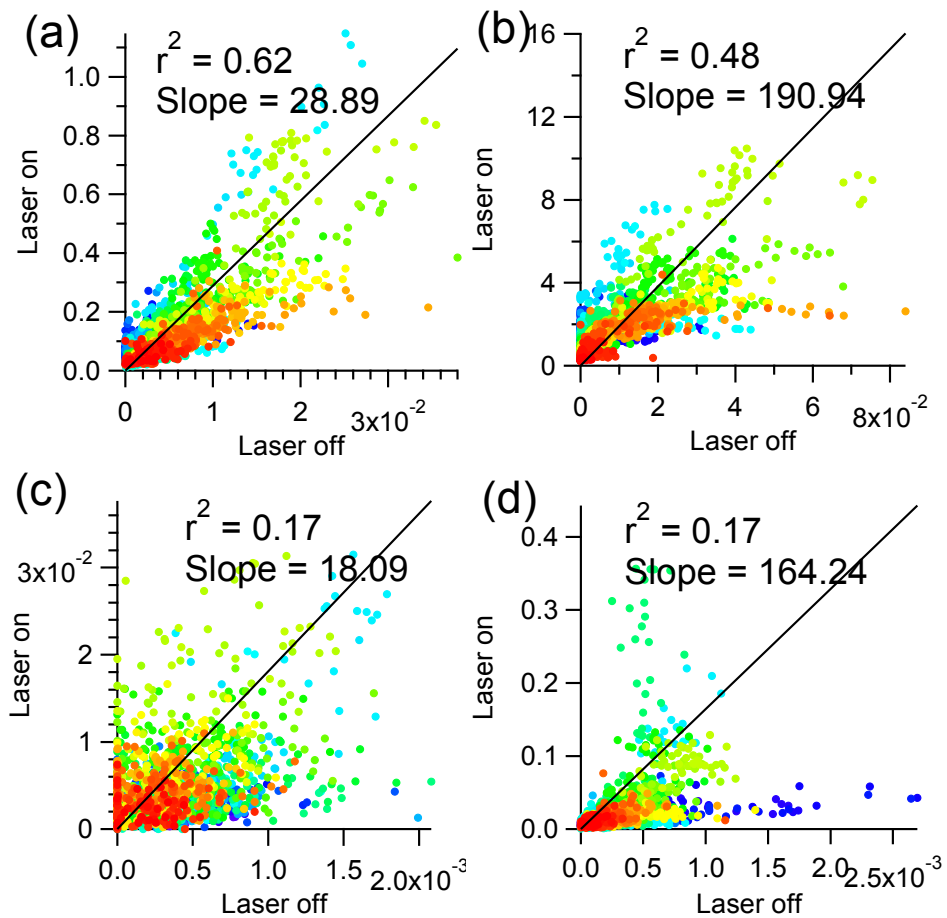

74  
75  
76  
77  
78  
79

Figure S7. Scatter plots of a few selected metal ions of (a) Na, (b) K, (c) Al, and (d) Fe, obtained with dual-vaporizers setting (laser on) vs. tungsten only setting (laser off) (colored by time)



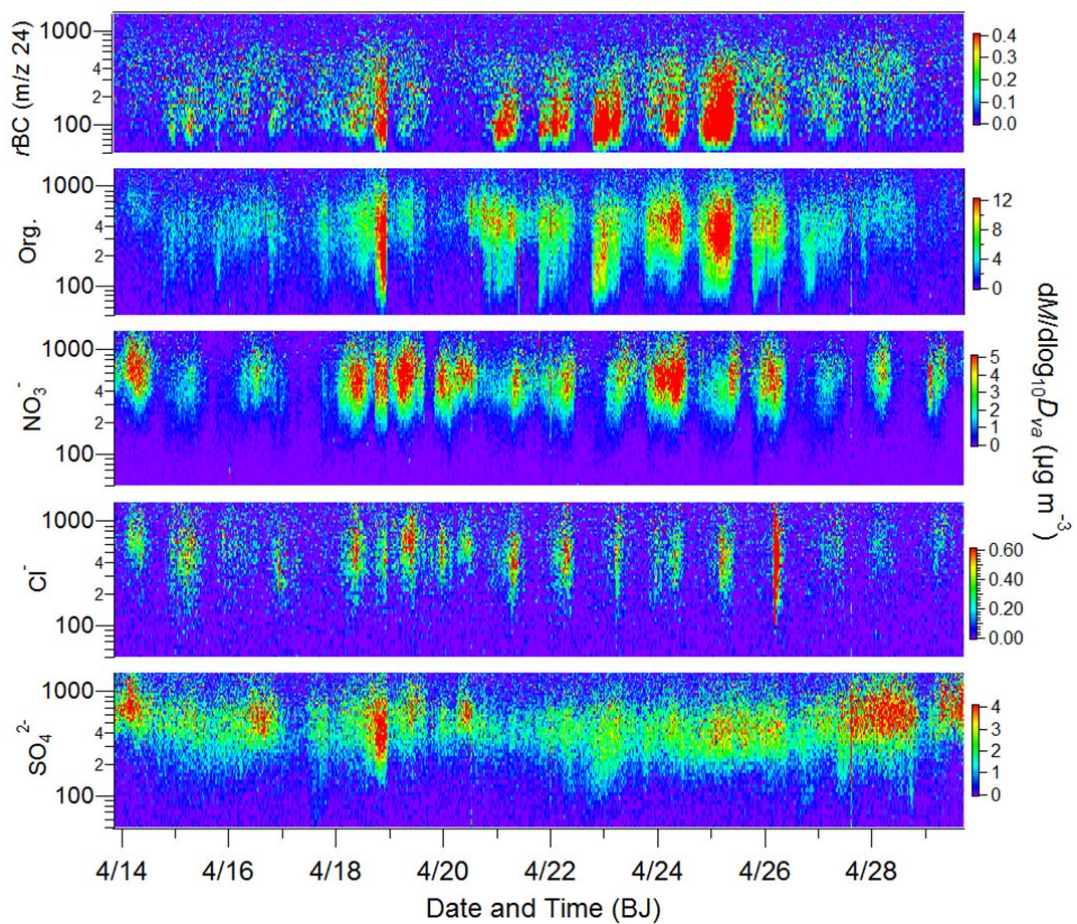

80

81 Figure S8. Temporal variations of the mass-based size distributions of rBC, organics,  
 82 nitrate, chloride, and sulfate over the sampling period.

83

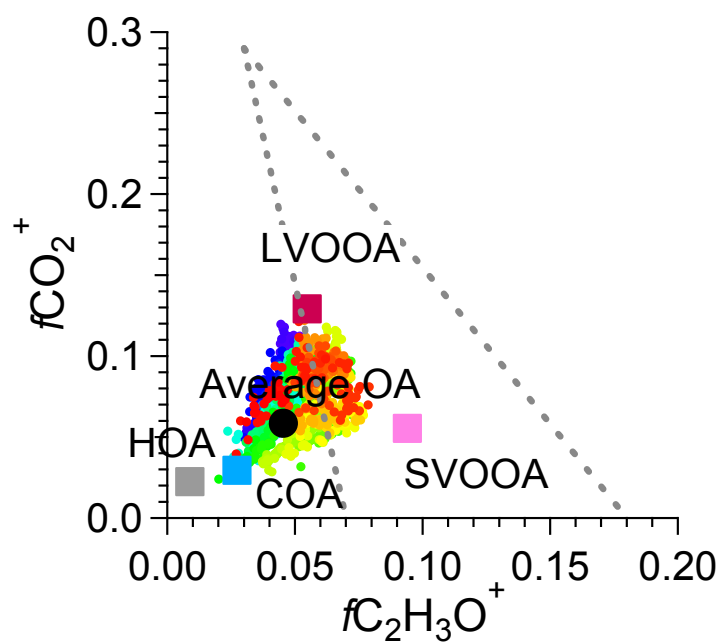

84

85

86 Figure S9. Triangle plot of  $f_{\text{CO}_2^+}$  vs.  $f_{\text{C}_2\text{H}_3\text{O}^+}$  for all OA (colored by time) and the  
 87 four OA factors identified by the PMF analyses.

88

89
